# Supplementary material
Source: PubMed Central journal article supplement (PMC2860230)

Supplemental Figure S1. Diagram of combined SILAC and 14-3-3 affinity purification method.

Supplemental Figure S2. Annotated MS/MS spectra of Edc3 phosphopeptides identified in this study using Mascot Server. A, Mascot annotated MS/MS spectrum and fragment ion table of the tryptic phosphopeptide HNpSWSSSSR containing pS161. Predicted fragment ions which were observed in the spectrum are highlighted within the table in bold red. The precursor ion and the y7 ion after neutral loss of phosphate are indicated in the lower MS/MS spectrum. The entire y-ion series of the intact phosphopeptide is also indicated in the lower spectrum. Mascot annotated MS/MS spectra and fragment ion tables for pS131 (B), pS109 (C), pT173 (D), and pY225 (E) are also shown. Predicted fragment ions which were observed in the spectra are highlighted within the table in bold red.

Supplemental Figure S3. Characterisation of the Edc3 pS161 antibody (a), Immunoblotting of immunoprecipitated TagRFP-FLAG-Edc3 constructs indicated from transiently transfected CHO IR/IRS-1 cells. Cells were stimulated with 100 nM insulin for 30 min. (b), Immunoblotting of endogenous Edc3 immunoprecipitated from NIH-3T3 cells with the Edc3 pS161 antibody. Cells were stimulated with 1  $\mu$ M insulin for 30 min. Immunoprecipitations were performed in the presence of a 10-fold molar excess of either the pS161 peptide used to generate the antibody (P1+P2) or the cognate non-phosphorylated peptide (NP). A SYPRO ruby stain of the immunoprecipitated protein is shown to show equal protein binding. Immunoblots are from a representative experiment (n = 3).

Supplemental Figure S4. Co-localisation of TagRFP-FLAG-Edc3 constructs and endogenous p-body markers in NIH-3T3 cells. The TagRFP-FLAG-Edc3 constructs indicated were transiently transfected into NIH-3T3 cells and imaged 96 hours post-transfection. Cells were either left unstimulated or stimulated with 1  $\mu$ M insulin for 30 min. Cells were then stained with antibodies specific for DDX6 and Hedls. Antibody labeling as well as TagRFP fluorescence was imaged by epifluorescence microscopy. White scale bar in top right panel indicates 10  $\mu$ m. Images are from a representative experiment (n = 3).

Supplemental Figure S5. Diagram of experimental design used in the SILAC-based Edc3 Interaction partner analysis. Non-specific binding was assessed by the inclusion of a vector only control (light SILAC label) and specific binding to either S161A-R18 (medium SILAC label) or Edc3 S161A-R18-KK (heavy SILAC label) was assessed by transient transfection of each of these constructs. Experimental or environmental contaminant proteins which bind non-specifically to the beads or the antibody typically have ratios equal to or less than 1:1:1.

Figure S1

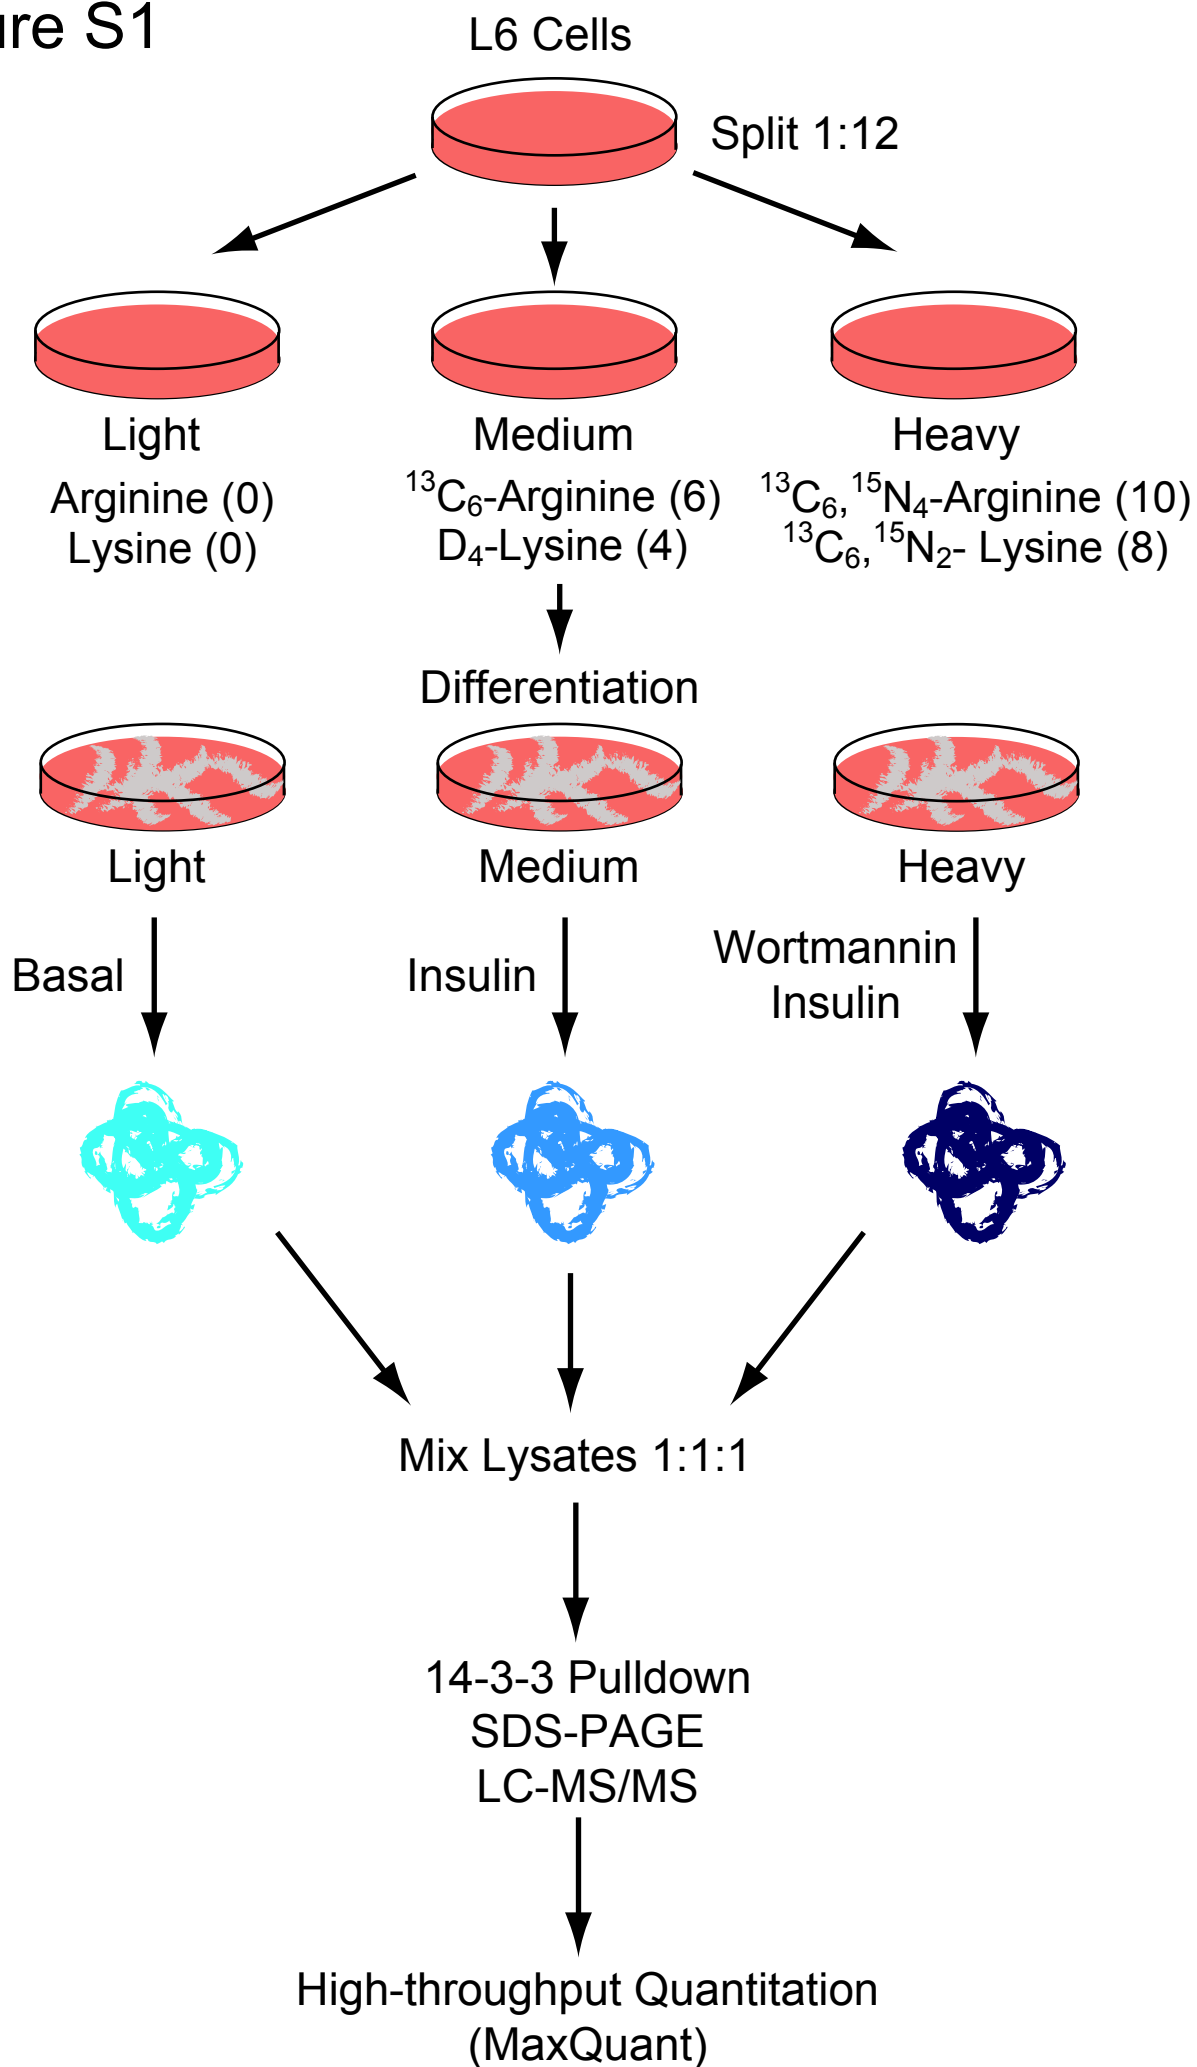

# Figure S2

A

pS161  
HNpSWSSSSR

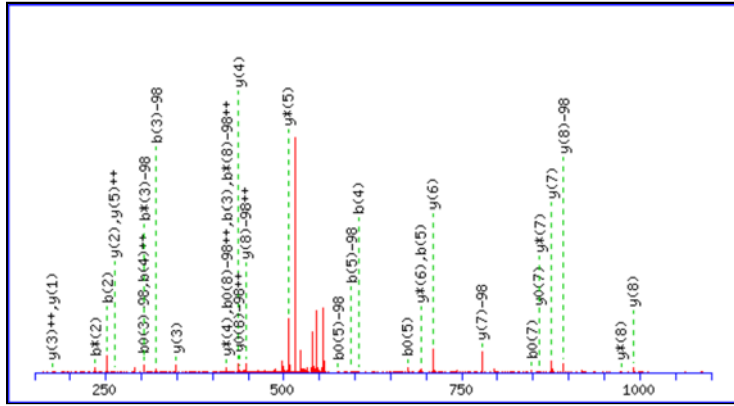

Monoisotopic mass of neutral peptide Mr(calc): 1126.419281

Variable modifications:

S3 : Phospho (ST), with neutral losses 97.976896 (shown in table), 0.000000

Matches (Bold Red): 34/136 fragment ions using 53 most intense peaks

| # | b                 | b <sup>++</sup> | b <sup>*</sup>    | b <sup>*++</sup>  | b <sup>0</sup>    | b <sup>0++</sup>  | Seq. | y                 | y <sup>++</sup>   | y <sup>*</sup>    | y <sup>*++</sup> | y <sup>0</sup> | y <sup>0++</sup>  | # |
|---|-------------------|-----------------|-------------------|-------------------|-------------------|-------------------|------|-------------------|-------------------|-------------------|------------------|----------------|-------------------|---|
| 1 | 138.066188        | 69.536732       |                   |                   |                   |                   | H    |                   |                   |                   |                  |                |                   | 9 |
| 2 | <b>252.109115</b> | 126.558195      | <b>235.082566</b> | 118.044921        |                   |                   | N    | <b>892.390760</b> | <b>446.699018</b> | 875.364211        | 438.185743       | 874.380195     | <b>437.693735</b> | 8 |
| 3 | <b>321.130571</b> | 161.068923      | <b>304.104022</b> | 152.555649        | <b>303.120006</b> | 152.063641        | S    | <b>778.347833</b> | 389.677554        | 761.321284        | 381.164280       | 760.337268     | 380.672272        | 7 |
| 4 | 507.209884        | 254.108580      | 490.183335        | 245.595305        | 489.199319        | 245.103297        | W    | <b>709.326377</b> | 355.166826        | <b>692.299828</b> | 346.653552       | 691.315812     | 346.161544        | 6 |
| 5 | <b>594.241912</b> | 297.624594      | 577.215363        | 289.111319        | <b>576.231347</b> | 288.619311        | S    | 523.247064        | <b>262.127170</b> | <b>506.220515</b> | 253.613895       | 505.236499     | 253.121887        | 5 |
| 6 | 681.273940        | 341.140608      | 664.247391        | 332.627333        | 663.263375        | 332.135325        | S    | <b>436.215036</b> | 218.611156        | <b>419.188487</b> | 210.097881       | 418.204471     | 209.605873        | 4 |
| 7 | 768.305968        | 384.656622      | 751.279419        | 376.143347        | 750.295403        | 375.651339        | S    | <b>349.183008</b> | <b>175.095142</b> | 332.156459        | 166.581867       | 331.172443     | 166.089859        | 3 |
| 8 | 855.337996        | 428.172636      | 838.311447        | <b>419.659361</b> | 837.327431        | <b>419.167353</b> | S    | <b>262.150980</b> | 131.579128        | 245.124431        | 123.065853       | 244.140415     | 122.573845        | 2 |
| 9 |                   |                 |                   |                   |                   |                   | R    | <b>175.118952</b> | 88.063114         | 158.092403        | 79.549839        |                |                   | 1 |

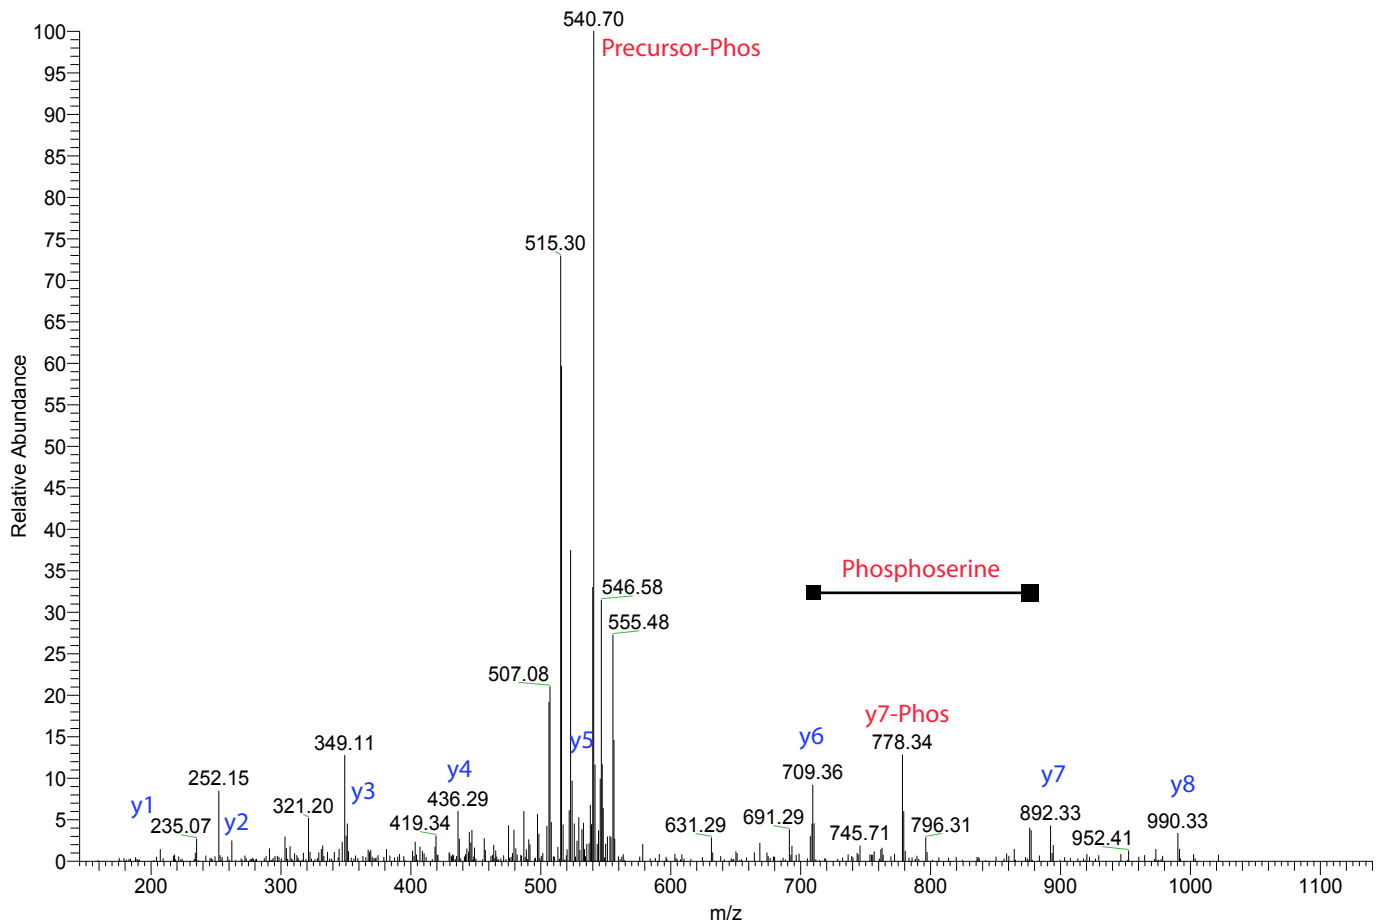

# Figure S2

B

pS131  
SQDVAVpSPQQQCSK

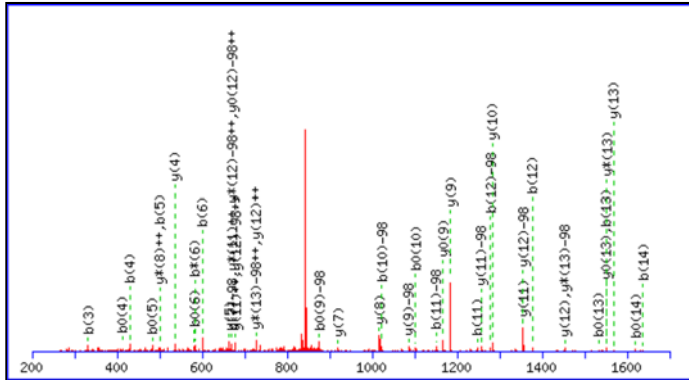

Monoisotopic mass of neutral peptide  $M_r(\text{calc})$ : 1782.760773

Variable modifications:

S7 : Phospho (ST), with neutral losses 0.000000 (shown in table), 97.976896

C13 : Propionamide (C)

Matches (Bold Red): 44/248 fragment ions using 58 most intense peaks

| #  | b                  | b <sup>++</sup> | b <sup>*</sup>    | b <sup>*++</sup> | b <sup>0</sup>     | b <sup>0++</sup> | Seq. | y                  | y <sup>++</sup>   | y <sup>*</sup>     | y <sup>*++</sup>  | y <sup>0</sup>     | y <sup>0++</sup> | #  |
|----|--------------------|-----------------|-------------------|------------------|--------------------|------------------|------|--------------------|-------------------|--------------------|-------------------|--------------------|------------------|----|
| 1  | 88.039304          | 44.523290       |                   |                  | 70.028739          | 35.518008        | S    |                    |                   |                    |                   |                    |                  | 15 |
| 2  | 216.097882         | 108.552579      | 199.071333        | 100.039305       | 198.087317         | 99.547296        | Q    | 1696.736017        | 848.871647        | 1679.709468        | 840.358372        | 1678.725452        | 839.866364       | 14 |
| 3  | <b>331.124825</b>  | 166.066050      | 314.098276        | 157.552776       | 313.114260         | 157.060768       | D    | <b>1568.677439</b> | 784.842358        | <b>1551.650890</b> | 776.329083        | <b>1550.666874</b> | 775.837075       | 13 |
| 4  | <b>430.193239</b>  | 215.600257      | 413.166690        | 207.086983       | <b>412.182674</b>  | 206.594975       | V    | <b>1453.650496</b> | <b>727.328886</b> | 1436.623947        | 718.815612        | 1435.639931        | 718.323604       | 12 |
| 5  | <b>501.230353</b>  | 251.118814      | 484.203804        | 242.605540       | <b>483.219788</b>  | 242.113532       | A    | <b>1354.582082</b> | <b>677.794679</b> | 1337.555533        | <b>669.281405</b> | 1336.571517        | 668.789397       | 11 |
| 6  | <b>600.298767</b>  | 300.653022      | <b>583.272218</b> | 292.139747       | <b>582.288202</b>  | 291.647739       | V    | <b>1283.544968</b> | 642.276122        | 1266.518419        | 633.762848        | 1265.534403        | 633.270840       | 10 |
| 7  | 767.297119         | 384.152197      | 750.270570        | 375.638923       | 749.286554         | 375.146915       | S    | <b>1184.476554</b> | 592.741915        | 1167.450005        | 584.228641        | <b>1166.465989</b> | 583.736633       | 9  |
| 8  | 864.349883         | 432.678580      | 847.323334        | 424.165305       | 846.339318         | 423.673297       | P    | <b>1017.478202</b> | 509.242739        | 1000.451653        | <b>500.729465</b> | 999.467637         | 500.237457       | 8  |
| 9  | 992.408461         | 496.707869      | 975.381912        | 488.194594       | 974.397896         | 487.702586       | Q    | <b>920.425438</b>  | 460.716357        | 903.398889         | 452.203083        | 902.414873         | 451.711075       | 7  |
| 10 | 1120.467039        | 560.737157      | 1103.440490       | 552.223883       | <b>1102.456474</b> | 551.731875       | Q    | 792.366860         | 396.687068        | 775.340311         | 388.173794        | 774.356295         | 387.681786       | 6  |
| 11 | <b>1248.525617</b> | 624.766447      | 1231.499068       | 616.253172       | 1230.515052        | 615.761164       | Q    | <b>664.308282</b>  | 332.657779        | 647.281733         | 324.144505        | 646.297717         | 323.652497       | 5  |
| 12 | <b>1376.584195</b> | 688.795736      | 1359.557646       | 680.282461       | 1358.573630        | 679.790453       | Q    | <b>536.249704</b>  | 268.628490        | 519.223155         | 260.115216        | 518.239139         | 259.623208       | 4  |
| 13 | <b>1550.630489</b> | 775.818883      | 1533.603940       | 767.305608       | <b>1532.619924</b> | 766.813600       | C    | 408.191126         | 204.599201        | 391.164577         | 196.085927        | 390.180561         | 195.593919       | 3  |
| 14 | <b>1637.662517</b> | 819.334897      | 1620.635968       | 810.821622       | <b>1619.651952</b> | 810.329614       | S    | 234.144832         | 117.576054        | 217.118283         | 109.062780        | 216.134267         | 108.570772       | 2  |
| 15 |                    |                 |                   |                  |                    |                  | K    | 147.112804         | 74.060040         | 130.086255         | 65.546765         |                    |                  | 1  |



# Figure S2

C

pS109  
KPApSSSSAPQNIK

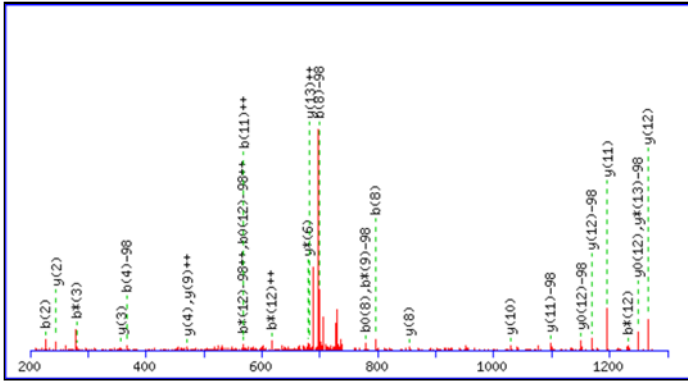

Monoisotopic mass of neutral peptide  $M_r(\text{calc})$ : 1490.712982

Variable modifications:

S4 : Phospho (ST), with neutral losses 97.976896 (shown in table), 0.000000

Matches (Bold Red): 29/214 fragment ions using 49 most intense peaks

| #  | b                  | b <sup>++</sup> | b*                | b <sup>*++</sup>  | b <sup>0</sup> | b <sup>0++</sup>  | Seq. | y                  | y <sup>++</sup>   | y*                 | y <sup>*++</sup> | y <sup>0</sup>     | y <sup>0++</sup> | #  |
|----|--------------------|-----------------|-------------------|-------------------|----------------|-------------------|------|--------------------|-------------------|--------------------|------------------|--------------------|------------------|----|
| 1  | 129.102239         | 65.054757       | 112.075690        | 56.541483         |                |                   | K    |                    |                   |                    |                  |                    |                  | 14 |
| 2  | <b>226.155003</b>  | 113.581139      | 209.128454        | 105.067865        |                |                   | P    | 1265.648433        | 633.327855        | <b>1248.621884</b> | 624.814580       | 1247.637868        | 624.322572       | 13 |
| 3  | 297.192117         | 149.099696      | <b>280.165568</b> | 140.586422        |                |                   | A    | <b>1168.595669</b> | 584.801473        | 1151.569120        | 576.288198       | <b>1150.585104</b> | 575.796190       | 12 |
| 4  | <b>366.213573</b>  | 183.610424      | 349.187024        | 175.097150        | 348.203008     | 174.605142        | S    | <b>1097.558555</b> | 549.282916        | 1080.532006        | 540.769641       | 1079.547990        | 540.277633       | 11 |
| 5  | 453.245601         | 227.126438      | 436.219052        | 218.613164        | 435.235036     | 218.121156        | S    | <b>1028.537099</b> | 514.772188        | 1011.510550        | 506.258913       | 1010.526534        | 505.766905       | 10 |
| 6  | 540.277629         | 270.642452      | 523.251080        | 262.129178        | 522.267064     | 261.637170        | S    | 941.505071         | <b>471.256174</b> | 924.478522         | 462.742899       | 923.494506         | 462.250891       | 9  |
| 7  | 627.309657         | 314.158466      | 610.283108        | 305.645192        | 609.299092     | 305.153184        | S    | <b>854.473043</b>  | 427.740160        | 837.446494         | 419.226885       | 836.462478         | 418.734877       | 8  |
| 8  | <b>698.346771</b>  | 349.677023      | 681.320222        | 341.163749        | 680.336206     | 340.671741        | A    | 767.441015         | 384.224146        | 750.414466         | 375.710871       |                    |                  | 7  |
| 9  | 795.399535         | 398.203405      | <b>778.372986</b> | 389.690131        | 777.388970     | 389.198123        | P    | 696.403901         | 348.705589        | <b>679.377352</b>  | 340.192314       |                    |                  | 6  |
| 10 | 923.458113         | 462.232694      | 906.431564        | 453.719420        | 905.447548     | 453.227412        | Q    | 599.351137         | 300.179207        | 582.324588         | 291.665932       |                    |                  | 5  |
| 11 | 1037.501040        | 519.254158      | 1020.474491       | 510.740884        | 1019.490475    | 510.248876        | N    | <b>471.292559</b>  | 236.149917        | 454.266010         | 227.636643       |                    |                  | 4  |
| 12 | <b>1150.585104</b> | 575.796190      | 1133.558555       | <b>567.282916</b> | 1132.574539    | <b>566.790908</b> | I    | <b>357.249632</b>  | 179.128454        | 340.223083         | 170.615179       |                    |                  | 3  |
| 13 | 1247.637868        | 624.322572      | 1230.611319       | 615.809298        | 1229.627303    | 615.317290        | P    | <b>244.165568</b>  | 122.586422        | 227.139019         | 114.073148       |                    |                  | 2  |
| 14 |                    |                 |                   |                   |                |                   | K    | 147.112804         | 74.060040         | 130.086255         | 65.546765        |                    |                  | 1  |

# Figure S2

D

pT173  
HPNQApTPK

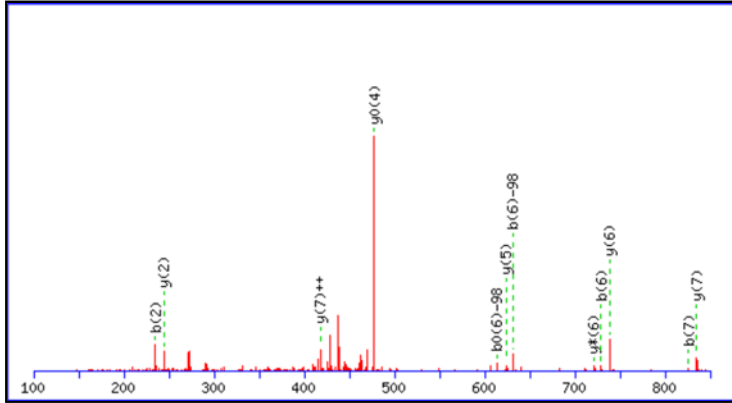

Monoisotopic mass of neutral peptide Mr(calc): 971.422577

Variable modifications:

T6 : Phospho (ST), with neutral losses 0.000000 (shown in table), 97.976896

Matches (Bold Red): 12/108 fragment ions using 24 most intense peaks

| # | b                 | b <sup>++</sup> | b <sup>*</sup> | b <sup>*++</sup> | b <sup>0</sup> | b <sup>0++</sup> | Seq. | y                 | y <sup>++</sup>   | y <sup>*</sup>    | y <sup>*++</sup> | y <sup>0</sup>    | y <sup>0++</sup> | # |
|---|-------------------|-----------------|----------------|------------------|----------------|------------------|------|-------------------|-------------------|-------------------|------------------|-------------------|------------------|---|
| 1 | 138.066188        | 69.536732       |                |                  |                |                  | H    |                   |                   |                   |                  |                   |                  | 8 |
| 2 | <b>235.118952</b> | 118.063114      |                |                  |                |                  | P    | <b>835.370954</b> | <b>418.189115</b> | 818.344405        | 409.675841       | 817.360389        | 409.183833       | 7 |
| 3 | 349.161879        | 175.084577      | 332.135330     | 166.571303       |                |                  | N    | <b>738.318190</b> | 369.662733        | <b>721.291641</b> | 361.149459       | 720.307625        | 360.657451       | 6 |
| 4 | 477.220457        | 239.113867      | 460.193908     | 230.600592       |                |                  | Q    | <b>624.275263</b> | 312.641270        | 607.248714        | 304.127995       | 606.264698        | 303.635987       | 5 |
| 5 | 548.257571        | 274.632424      | 531.231022     | 266.119149       |                |                  | A    | 496.216685        | 248.611981        | 479.190136        | 240.098706       | <b>478.206120</b> | 239.606698       | 4 |
| 6 | <b>729.271574</b> | 365.139425      | 712.245025     | 356.626151       | 711.261009     | 356.134143       | T    | 425.179571        | 213.093424        | 408.153022        | 204.580149       | 407.169006        | 204.088141       | 3 |
| 7 | <b>826.324338</b> | 413.665807      | 809.297789     | 405.152533       | 808.313773     | 404.660525       | P    | <b>244.165568</b> | 122.586422        | 227.139019        | 114.073148       |                   |                  | 2 |
| 8 |                   |                 |                |                  |                |                  | K    | 147.112804        | 74.060040         | 130.086255        | 65.546765        |                   |                  | 1 |

# Figure S2

E

pY225  
AAVFEEIDTpYER

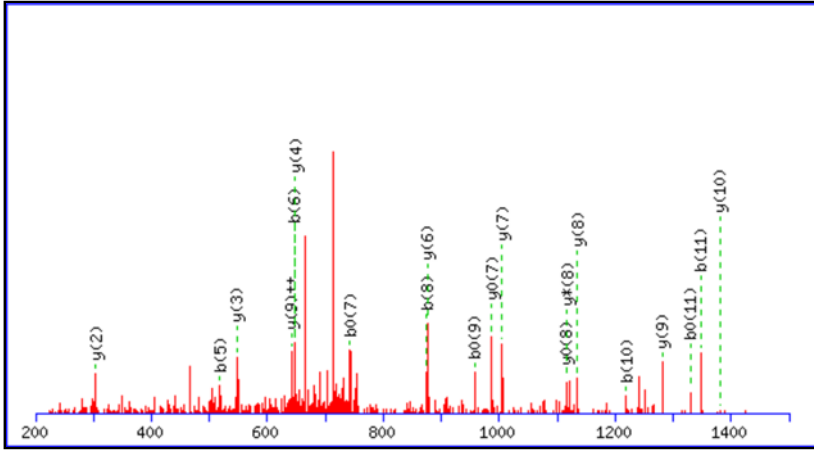

Monoisotopic mass of neutral peptide  $M_r(\text{calc})$ : 1521.638824

Variable modifications:

Y10 : Phospho (Y)

Matches (**Bold Red**): 20/100 fragment ions using 44 most intense peaks

| #  | b                  | b <sup>++</sup> | b <sup>0</sup>     | b <sup>0++</sup> | Seq. | y                  | y <sup>++</sup>   | y <sup>*</sup>     | y <sup>*++</sup> | y <sup>0</sup>     | y <sup>0++</sup> | #  |
|----|--------------------|-----------------|--------------------|------------------|------|--------------------|-------------------|--------------------|------------------|--------------------|------------------|----|
| 1  | 72.044390          | 36.525833       |                    |                  | A    |                    |                   |                    |                  |                    |                  | 12 |
| 2  | 143.081504         | 72.044390       |                    |                  | A    | 1451.609012        | 726.308144        | 1434.582463        | 717.794870       | 1433.598447        | 717.302861       | 11 |
| 3  | 242.149918         | 121.578597      |                    |                  | V    | <b>1380.571898</b> | 690.789587        | 1363.545349        | 682.276313       | 1362.561333        | 681.784304       | 10 |
| 4  | 389.218332         | 195.112804      |                    |                  | F    | <b>1281.503484</b> | <b>641.255380</b> | 1264.476935        | 632.742105       | 1263.492919        | 632.250097       | 9  |
| 5  | <b>518.260925</b>  | 259.634101      | 500.250360         | 250.628818       | E    | <b>1134.435070</b> | 567.721173        | <b>1117.408521</b> | 559.207898       | <b>1116.424505</b> | 558.715890       | 8  |
| 6  | <b>647.303518</b>  | 324.155397      | 629.292953         | 315.150115       | E    | <b>1005.392477</b> | 503.199876        | 988.365928         | 494.686602       | <b>987.381912</b>  | 494.194594       | 7  |
| 7  | 760.387582         | 380.697429      | <b>742.377017</b>  | 371.692147       | I    | <b>876.349884</b>  | 438.678580        | 859.323335         | 430.165305       | 858.339319         | 429.673297       | 6  |
| 8  | <b>875.414525</b>  | 438.210901      | 857.403960         | 429.205618       | D    | 763.265820         | 382.136548        | 746.239271         | 373.623273       | 745.255255         | 373.131265       | 5  |
| 9  | 976.462204         | 488.734740      | <b>958.451639</b>  | 479.729458       | T    | <b>648.238877</b>  | 324.623076        | 631.212328         | 316.109802       | 630.228312         | 315.617794       | 4  |
| 10 | <b>1219.491857</b> | 610.249567      | 1201.481292        | 601.244284       | Y    | <b>547.191198</b>  | 274.099237        | 530.164649         | 265.585962       | 529.180633         | 265.093954       | 3  |
| 11 | <b>1348.534450</b> | 674.770863      | <b>1330.523885</b> | 665.765580       | E    | <b>304.161545</b>  | 152.584410        | 287.134996         | 144.071136       | 286.150980         | 143.579128       | 2  |
| 12 |                    |                 |                    |                  | R    | 175.118952         | 88.063114         | 158.092403         | 79.549839        |                    |                  | 1  |

# Figure S3

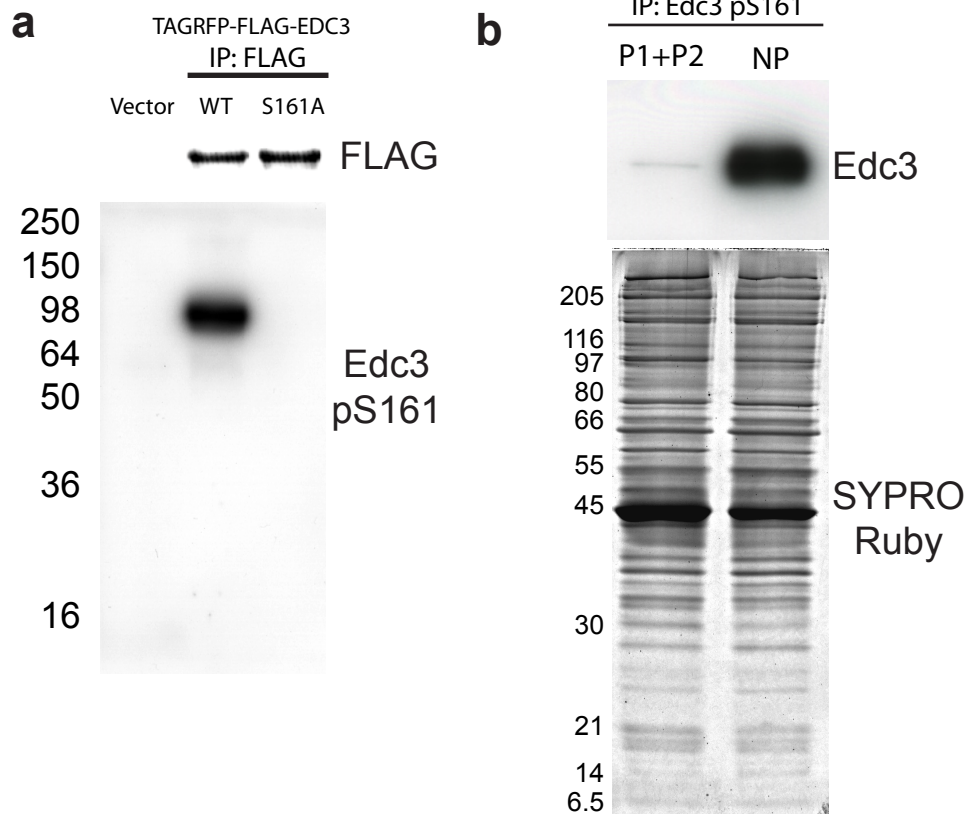

# Figure S4

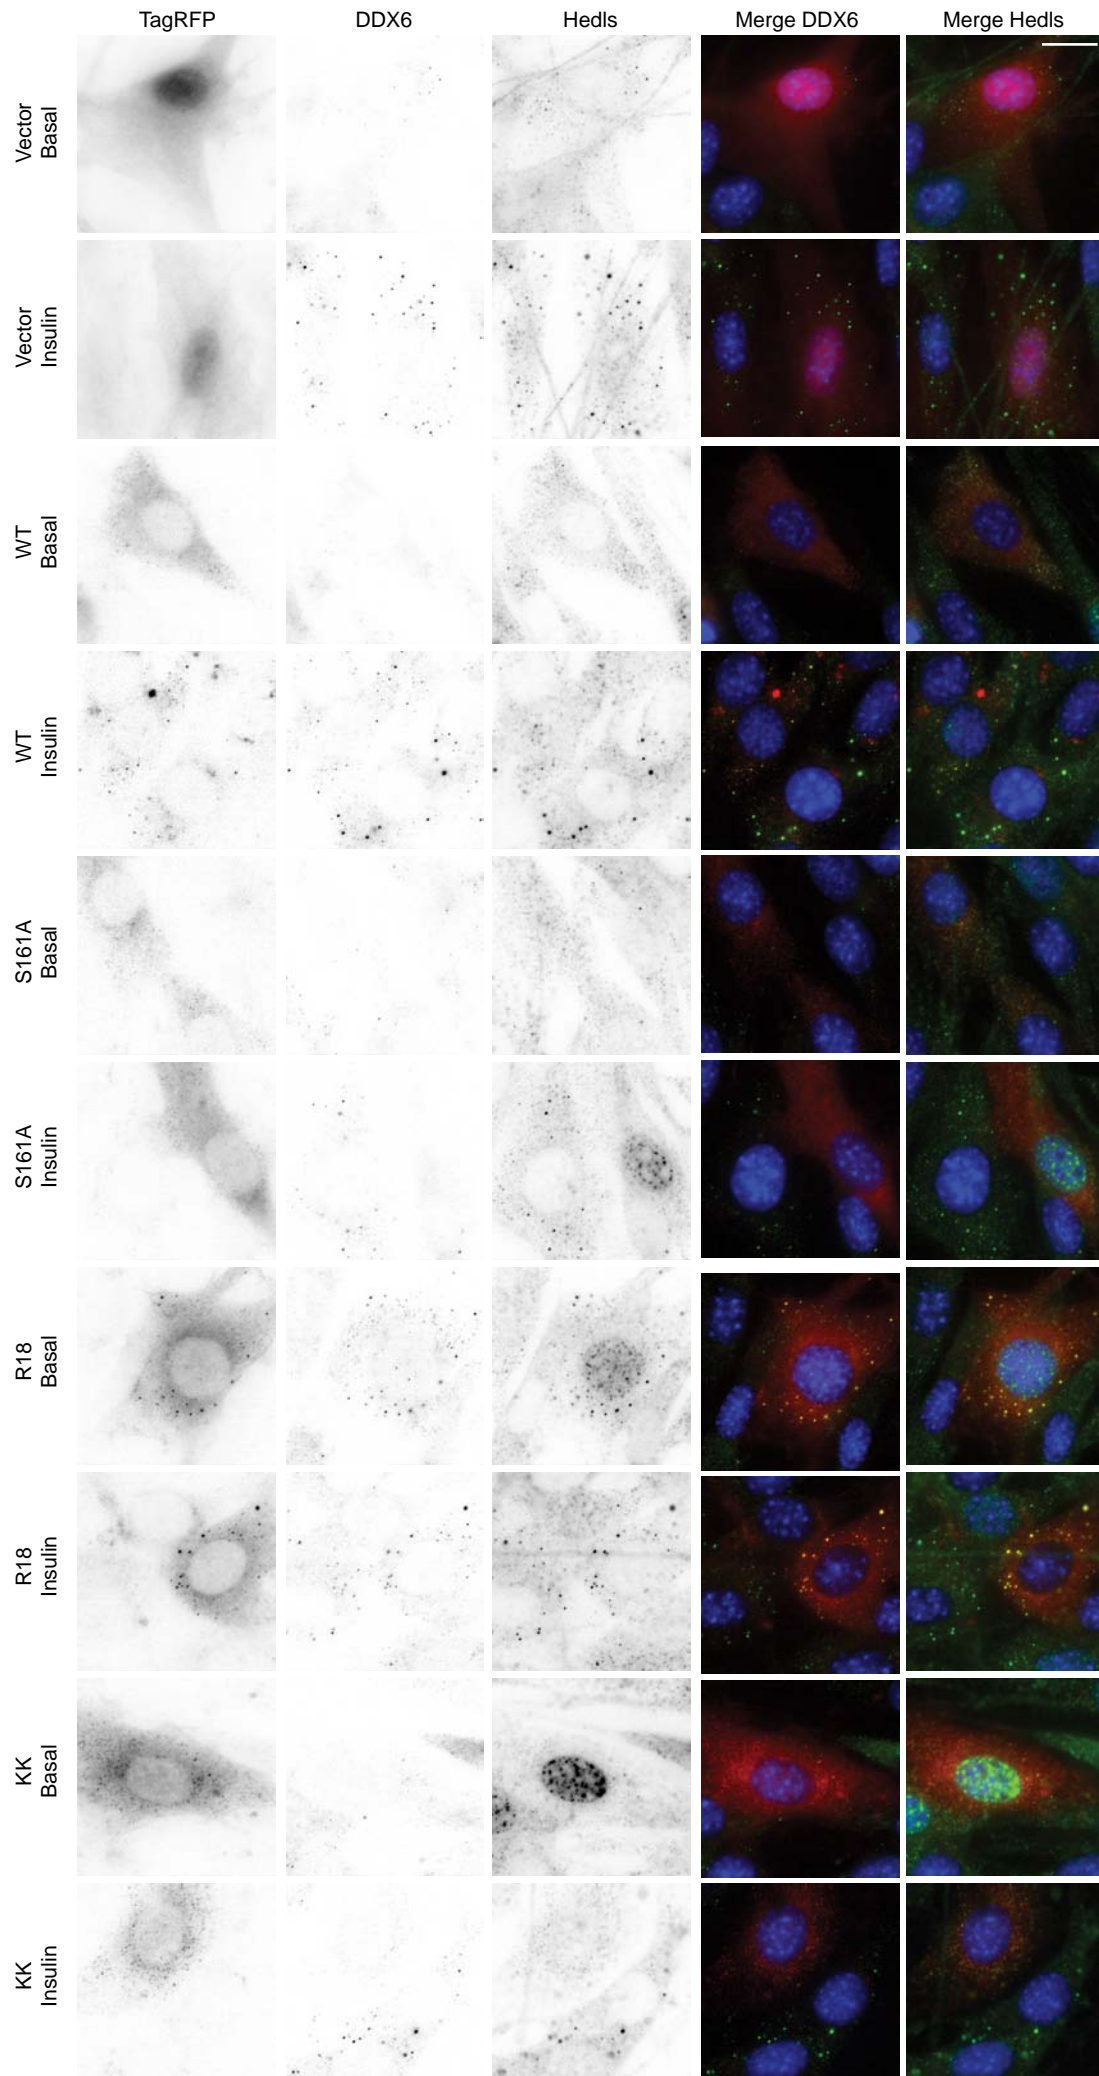

Figure S5

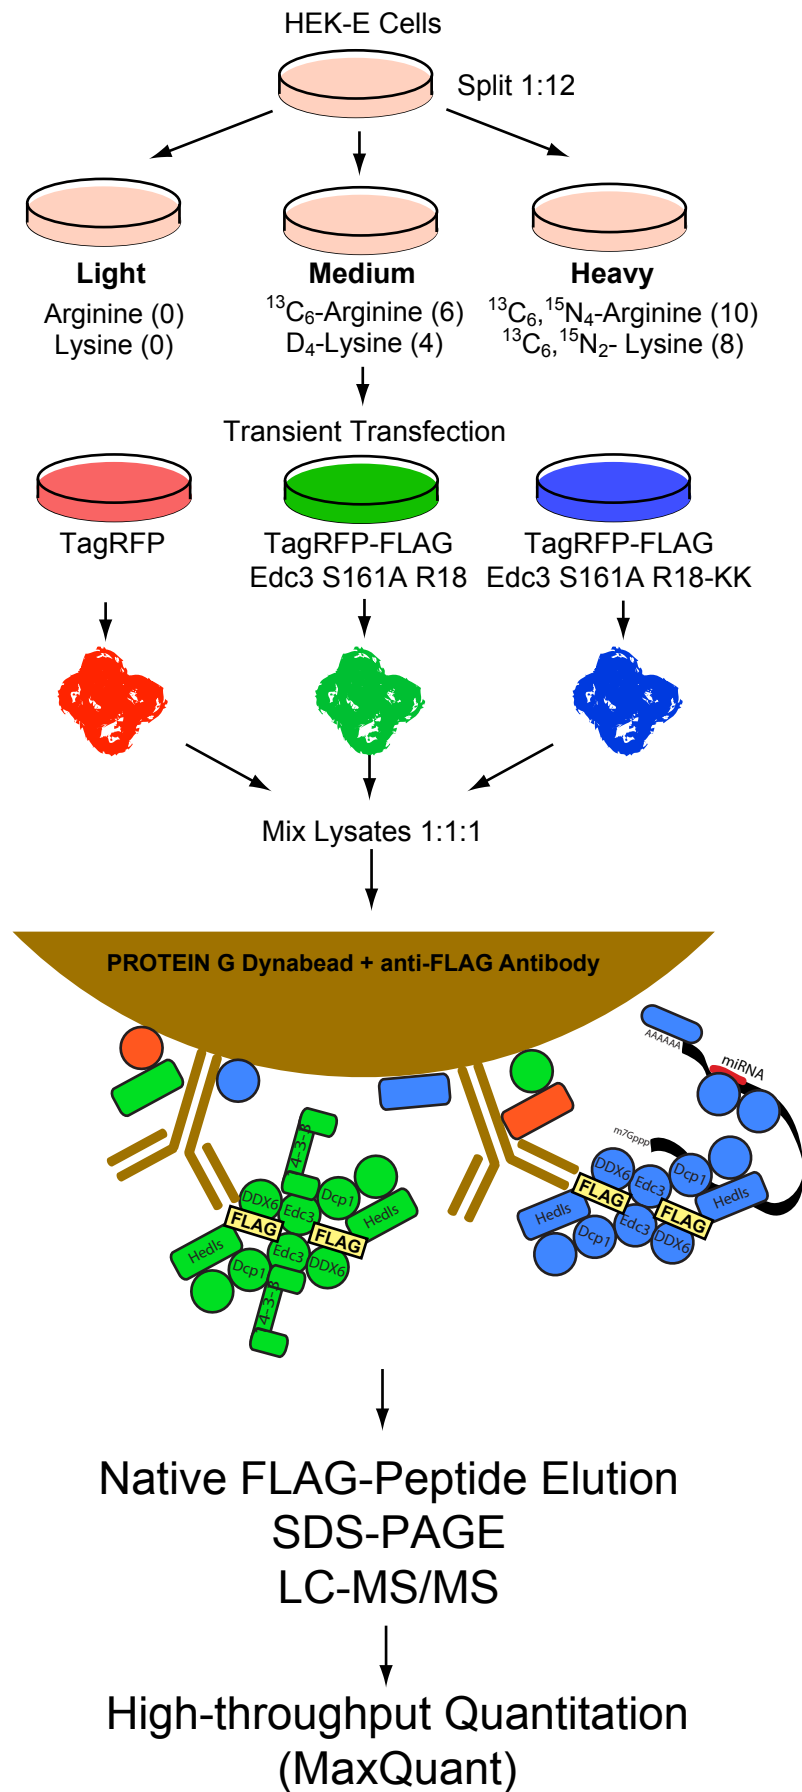

Supplement: supp_M900435-MCP200_Suppleg.pdf [file supp_M900435-MCP200_Suppleg.pdf]
